# Supplementary material
Source: Research Square preprint supplement (doi:10.21203/rs.3.rs-9889011/v1)
Supplement: Supplementary file 2 [file 41566636978b984efcb123e8.docx]

**Table S1: Search string.**

| **Database** | **Search string** | **Results** |
| --- | --- | --- |
| PubMed | (("Neoplasm, Rectal") OR ("Rectal Neoplasm") OR ("Neoplasms, Rectal") OR ("Rectum Neoplasms") OR ("Neoplasm, Rectum") OR ("Rectum Neoplasm") OR ("Rectal Tumors") OR ("Rectal Tumor") OR ("Tumor, Rectal") OR ("Cancer of Rectum") OR ("Rectum Cancers") OR ("Cancer of the Rectum") OR ("Rectal Cancer") OR ("Cancer, Rectal") OR ("Rectal Cancers") OR ("Rectum Cancer") OR ("Cancer, Rectum")  )  AND  (  ("Endoscopic Surgeries, Transanal") OR ("Endoscopic Surgery, Transanal") OR ("Surgeries, Transanal Endoscopic") OR ("Surgery, Transanal Endoscopic") OR ("Transanal Endoscopic Surgeries") OR ("Transanal Endoscopic Surgical Procedures") OR ("Transanal Minimally Invasive Surgery") OR ("TAMIS")  OR  ("Proctectomies") OR ("Rectum Excision") OR ("Excision, Rectum") OR ("Rectum Excisions") OR ("Rectum Resection") OR ("Rectum Resections") OR ("Resection, Rectum") OR ("Abdominoperineal Resection") OR ("Abdominoperineal Resections") OR ("Resection, Abdominoperineal") OR ("Resections, Abdominoperineal") OR ("Abdomino-perineal Excision") OR ("Abdomino perineal Excision") OR ("Abdomino-perineal Excisions") OR ("Excision, Abdomino-perineal") OR ("Abdomino-Perineal Rectum Excision") OR ("Abdomino Perineal Rectum Excision") OR ("Abdomino-Perineal Rectum Excisions") OR ("Excision, Abdomino-Perineal Rectum") OR ("Excisions, Abdomino-Perineal Rectum") OR ("Rectum Excision, Abdomino-Perineal") OR ("Abdomino-Perineal Resection") OR ("Abdomino Perineal Resection") OR ("Abdomino-Perineal Resections") OR ("Resection, Abdomino-Perineal") OR ("Abdominoperineal Excision") OR ("Abdominoperineal Excisions") OR ("Excision, Abdominoperineal") OR ("Abdominoperineal Rectum Excision") OR ("Abdominoperineal Rectum Excisions") OR ("Excision, Abdominoperineal Rectum") OR ("Rectum Excision, Abdominoperineal")  ) | **7,039** |
| **Cochrane library** | (("Neoplasm, Rectal") OR ("Rectal Neoplasm") OR ("Neoplasms, Rectal") OR ("Rectum Neoplasms") OR ("Neoplasm, Rectum") OR ("Rectum Neoplasm") OR ("Rectal Tumors") OR ("Rectal Tumor") OR ("Tumor, Rectal") OR ("Cancer of Rectum") OR ("Rectum Cancers") OR ("Cancer of the Rectum") OR ("Rectal Cancer") OR ("Cancer, Rectal") OR ("Rectal Cancers") OR ("Rectum Cancer") OR ("Cancer, Rectum")) AND (("Endoscopic Surgeries, Transanal") OR ("Endoscopic Surgery, Transanal") OR ("Surgeries, Transanal Endoscopic") OR ("Surgery, Transanal Endoscopic") OR ("Transanal Endoscopic Surgeries") OR ("Transanal Endoscopic Surgical Procedures") OR ("Transanal Minimally Invasive Surgery") OR ("TAMIS") OR ("Proctectomies") OR ("Rectum Excision") OR ("Excision, Rectum") OR ("Rectum Excisions") OR ("Rectum Resection") OR ("Rectum Resections") OR ("Resection, Rectum") OR ("Abdominoperineal Resection") OR ("Abdominoperineal Resections") OR ("Resection, Abdominoperineal") OR ("Resections, Abdominoperineal") OR ("Abdomino-perineal Excision") OR ("Abdomino perineal Excision") OR ("Abdomino-perineal Excisions") OR ("Excision, Abdomino-perineal") OR ("Abdomino-Perineal Rectum Excision") OR ("Abdomino Perineal Rectum Excision") OR ("Abdomino-Perineal Rectum Excisions") OR ("Excision, Abdomino-Perineal Rectum") OR ("Excisions, Abdomino-Perineal Rectum") OR ("Rectum Excision, Abdomino-Perineal") OR ("Abdomino-Perineal Resection") OR ("Abdomino Perineal Resection") OR ("Abdomino-Perineal Resections") OR ("Resection, Abdomino-Perineal") OR ("Abdominoperineal Excision") OR ("Abdominoperineal Excisions") OR ("Excision, Abdominoperineal") OR ("Abdominoperineal Rectum Excision") OR ("Abdominoperineal Rectum Excisions") OR ("Excision, Abdominoperineal Rectum") OR ("Rectum Excision, Abdominoperineal")) | **3000** |
| **Embase** | (("Neoplasm, Rectal") OR ("Rectal Neoplasm") OR ("Neoplasms, Rectal") OR ("Rectum Neoplasms") OR ("Neoplasm, Rectum") OR ("Rectum Neoplasm") OR ("Rectal Tumors") OR ("Rectal Tumor") OR ("Tumor, Rectal") OR ("Cancer of Rectum") OR ("Rectum Cancers") OR ("Cancer of the Rectum") OR ("Rectal Cancer") OR ("Cancer, Rectal") OR ("Rectal Cancers") OR ("Rectum Cancer") OR ("Cancer, Rectum")) AND (("Endoscopic Surgeries, Transanal") OR ("Endoscopic Surgery, Transanal") OR ("Surgeries, Transanal Endoscopic") OR ("Surgery, Transanal Endoscopic") OR ("Transanal Endoscopic Surgeries") OR ("Transanal Endoscopic Surgical Procedures") OR ("Transanal Minimally Invasive Surgery") OR ("TAMIS") OR ("Proctectomies") OR ("Rectum Excision") OR ("Excision, Rectum") OR ("Rectum Excisions") OR ("Rectum Resection") OR ("Rectum Resections") OR ("Resection, Rectum") OR ("Abdominoperineal Resection") OR ("Abdominoperineal Resections") OR ("Resection, Abdominoperineal") OR ("Resections, Abdominoperineal") OR ("Abdomino-perineal Excision") OR ("Abdomino perineal Excision") OR ("Abdomino-perineal Excisions") OR ("Excision, Abdomino-perineal") OR ("Abdomino-Perineal Rectum Excision") OR ("Abdomino Perineal Rectum Excision") OR ("Abdomino-Perineal Rectum Excisions") OR ("Excision, Abdomino-Perineal Rectum") OR ("Excisions, Abdomino-Perineal Rectum") OR ("Rectum Excision, Abdomino-Perineal") OR ("Abdomino-Perineal Resection") OR ("Abdomino Perineal Resection") OR ("Abdomino-Perineal Resections") OR ("Resection, Abdomino-Perineal") OR ("Abdominoperineal Excision") OR ("Abdominoperineal Excisions") OR ("Excision, Abdominoperineal") OR ("Abdominoperineal Rectum Excision") OR ("Abdominoperineal Rectum Excisions") OR ("Excision, Abdominoperineal Rectum") OR ("Rectum Excision, Abdominoperineal")) | **4300** |

**Table S2: Meta-analysis and trial sequential analysis for primary outcomes**

| **Outcomes (dichotomous)** | **Meta-analysis** | | | **Trial Sequential Analysis** | | | | | | |
| --- | --- | --- | --- | --- | --- | --- | --- | --- | --- | --- |
|  | **RR (95% CI)** | **P value** | **I² (%)** | **IIA (%)** | **ICA (%)** | **RRR (%)** | **D² (%)** | **RIS (n)** | **RIS reached** | **Evidence** |
| R0 resection rate | 1.02 (0.92–1.12) | 0.765 | 93.0 | 94.27 | 96.90 | 2.71 | 97.36 | 72,585* | No | AE |
| CRM positivity rate | 0.70 (0.22–2.25) | 0.551 | 38.5 | 0.99 | 1.62 | 38.89 | 50.26 | 20,484 | No | AE |
| Completeness of mesorectal excision | 1.05 (0.98–1.12) | 0.181 | 51.6 | 85.29 | 83.92 | −1.63 | 67.38 | 66,799* | No | AE |

*TaTME and LaTME were considered the intervention and control groups respectively. The α and 1-β were defined as 5% and 80%, respectively.*

*IIA: incidence in intervention arm; ICA: incidence in control arm; RRR: relative risk reduction; D²: diversity; RIS: required information size; AE: absent evidence.*

**RIS was not displayed on the TSA graph due to insufficient information size (R0 resection rate: 3.1%; completeness of mesorectal excision: 3.53%). The RIS value was calculated by the TSA software but the alpha-spending boundary could not be plotted.*

**
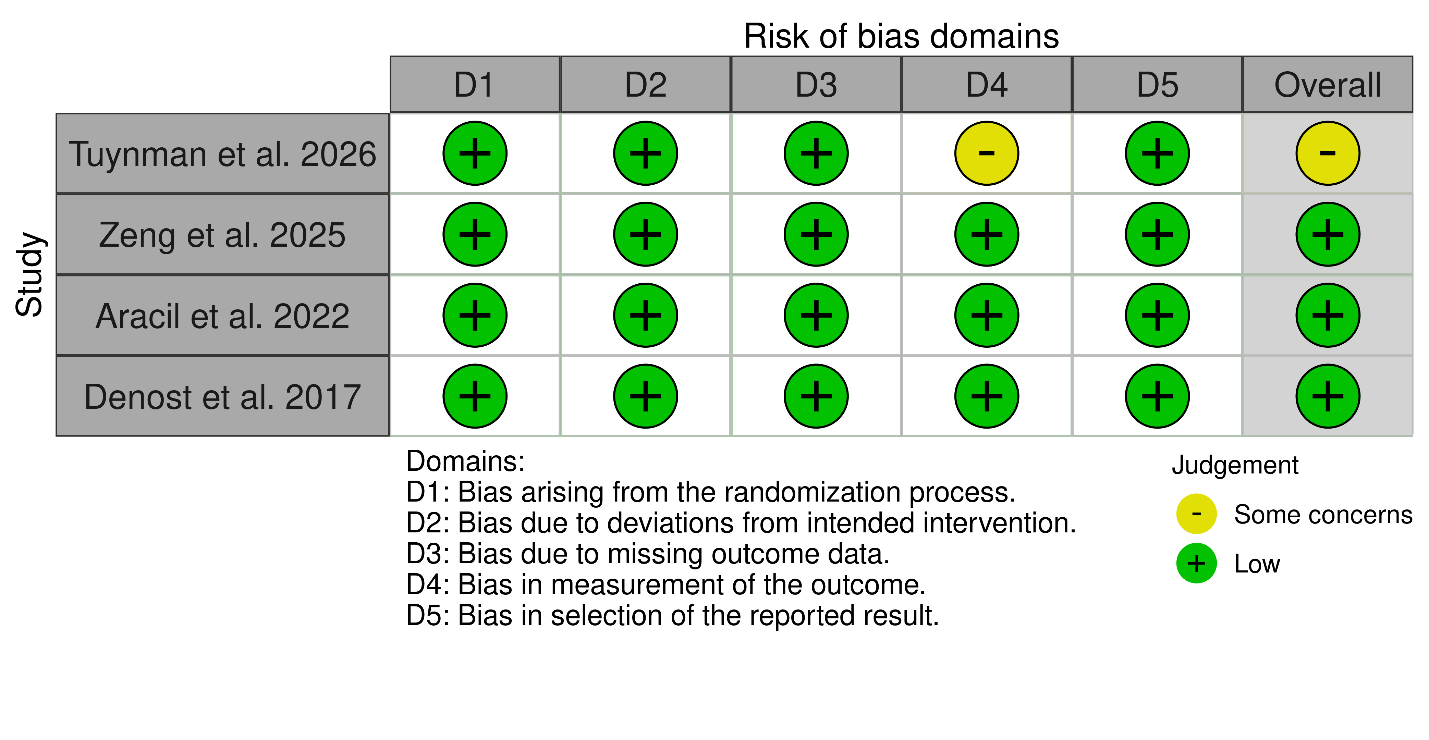
**

**Figure S1:** Traffic plot of included studies.

**
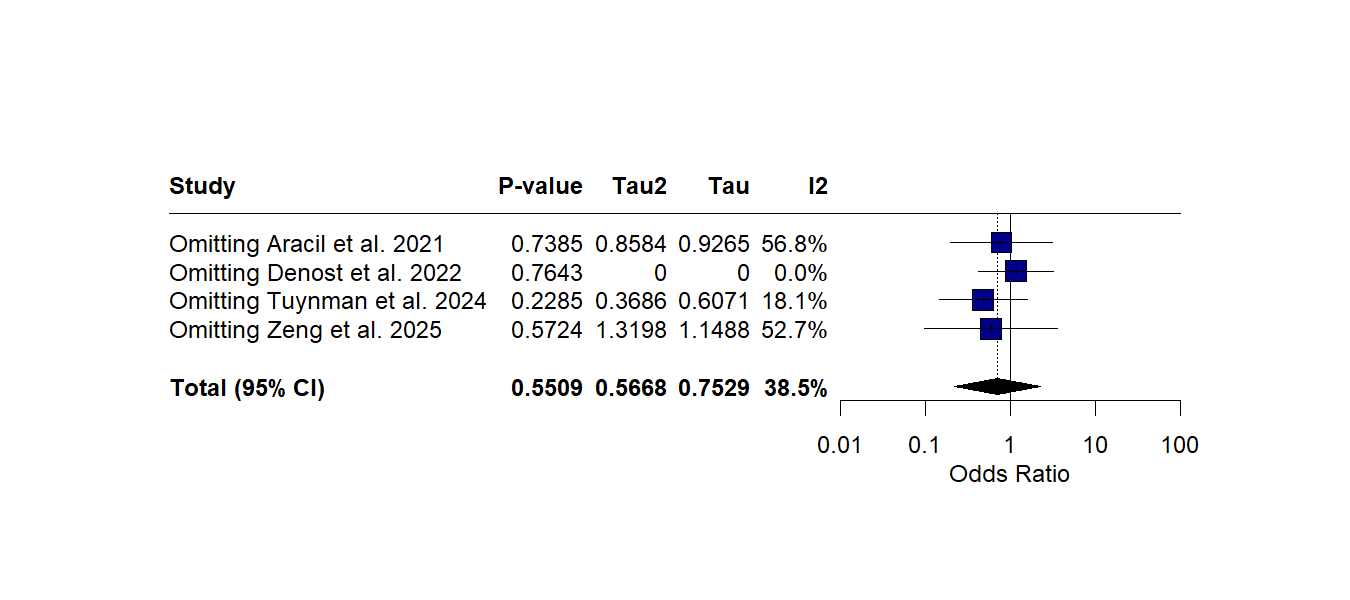
**

**Figure S2a: Influencial plot of Circumferential resection margin (CRM) positivity**

**
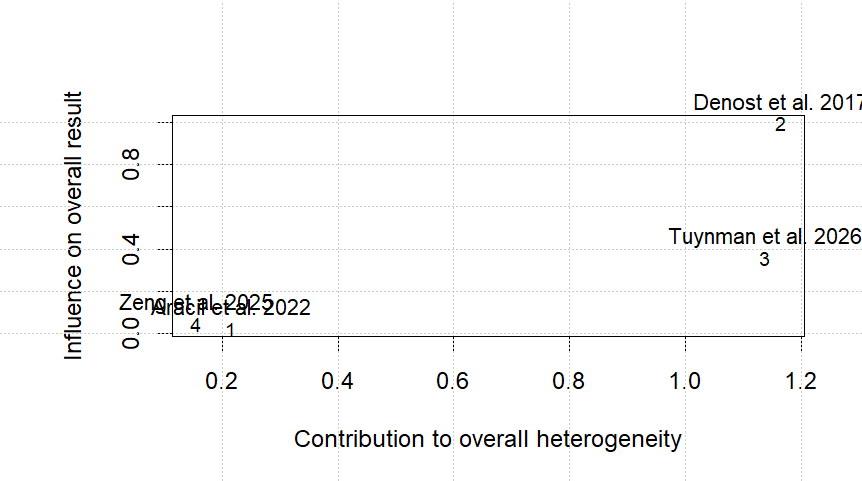
**

**Figure S2b:** Baujat plot of CRM positivity.


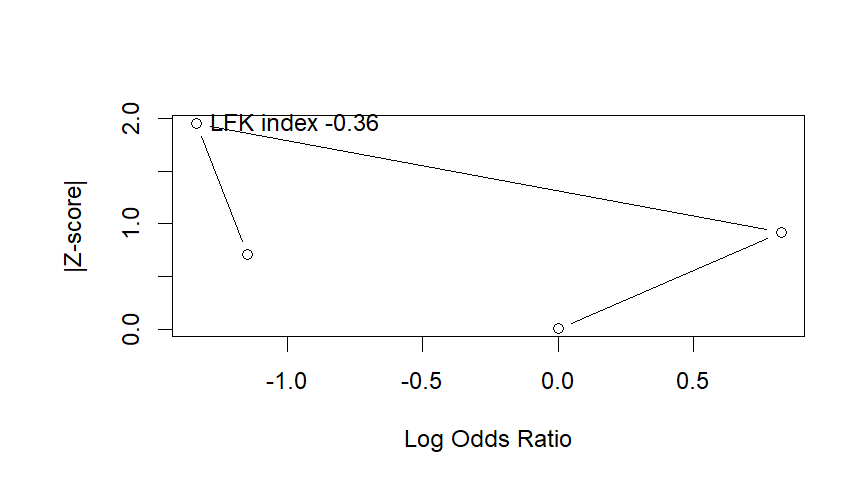


**Figure S2c:** DOI plot of CRM positivity.


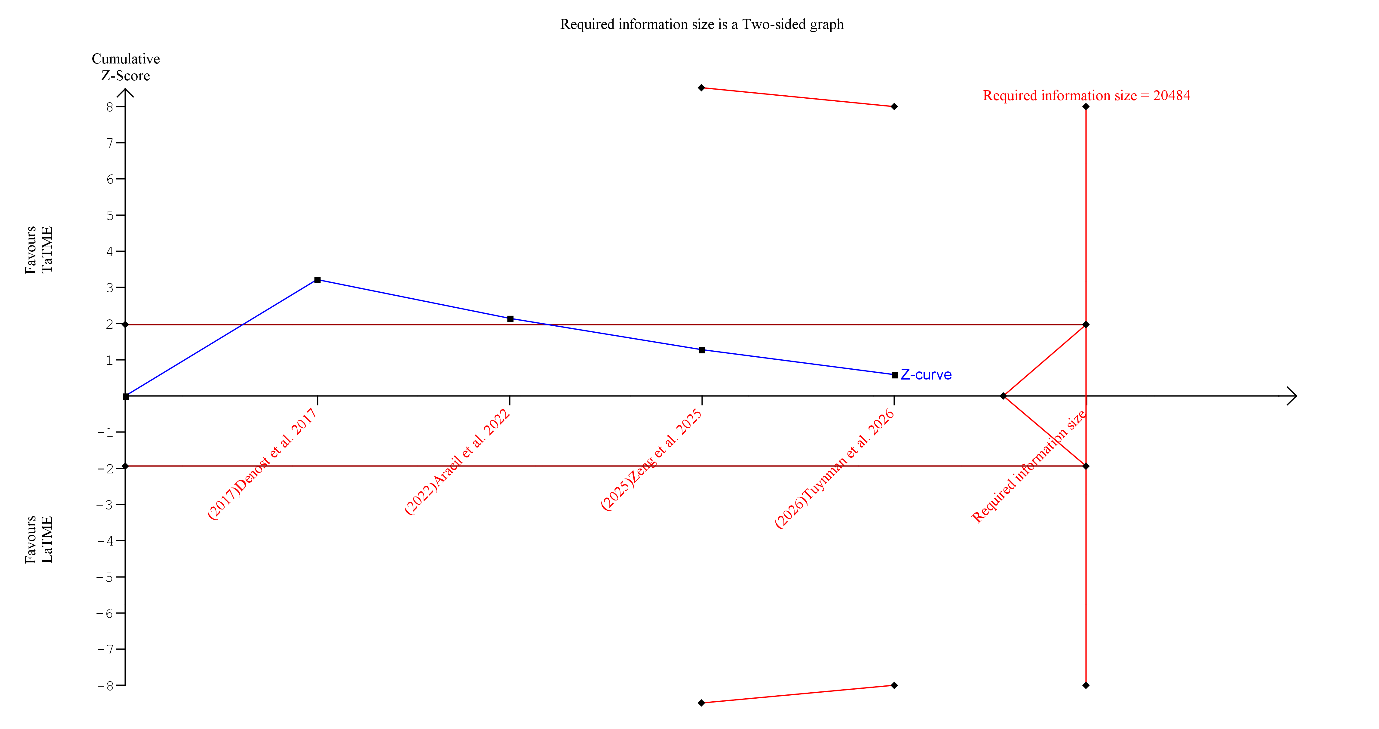


**Figure S2d:** TSA of CRM positivity.**
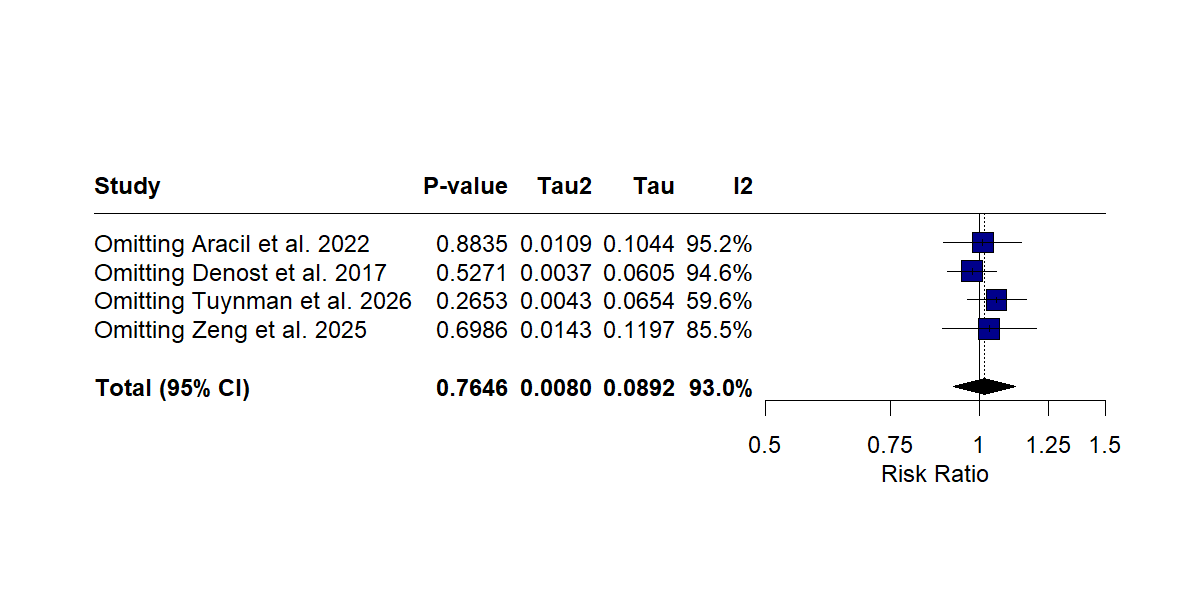
**

**Figure S3a**: Influencial plot of **R0 resection rate**


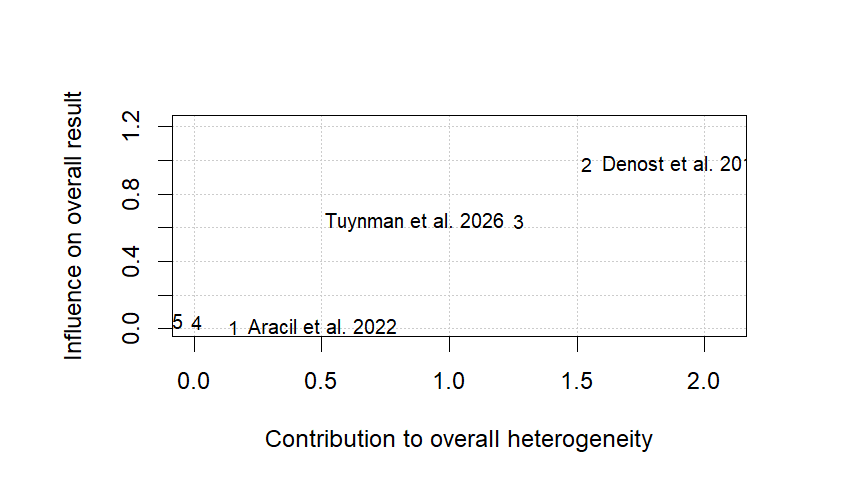


**Figure S3b**: Baujat Plot of **R0 resection rate**

**
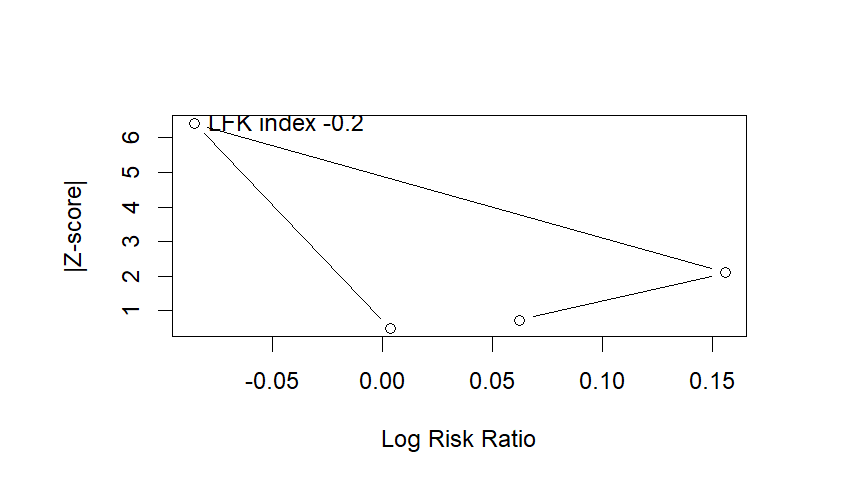
**

**Figure S3c:** DOI plot of **R0 resection rate**


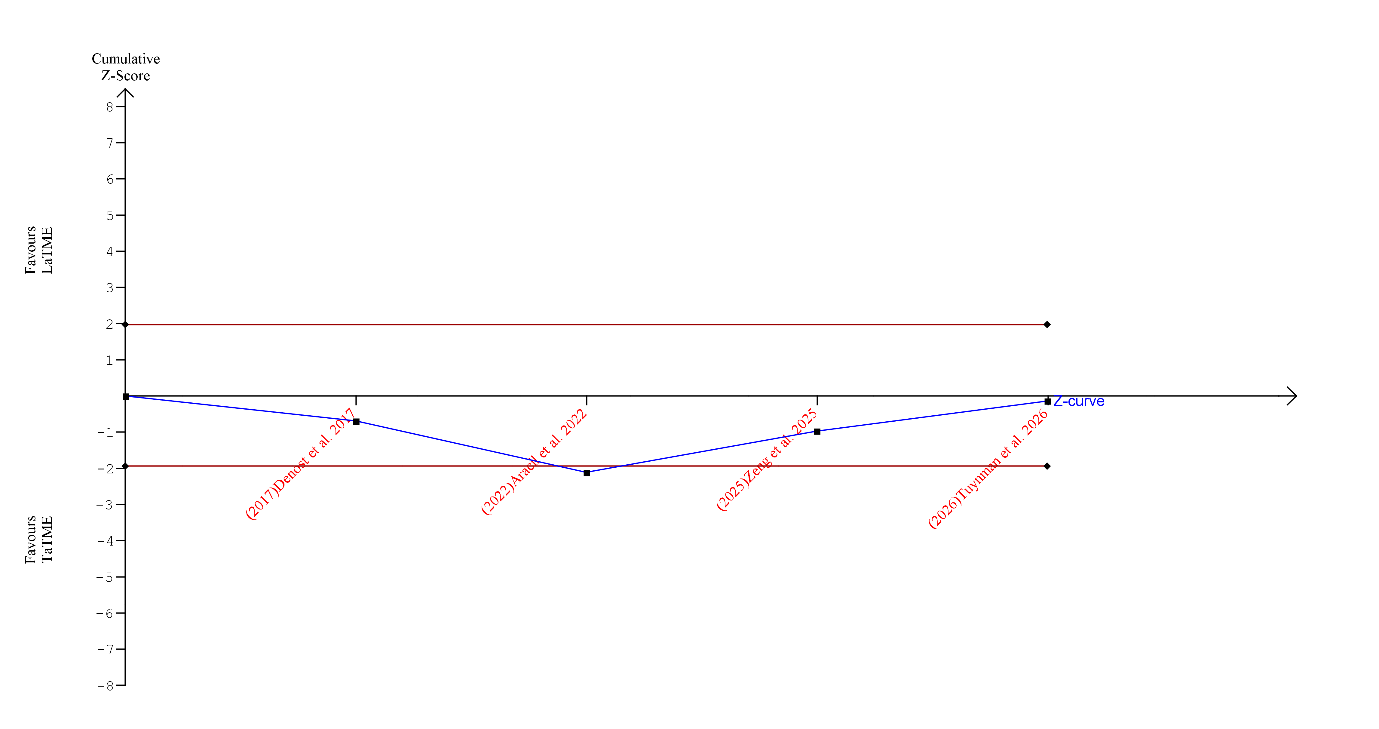


**Figure S3d:** TSA of **R0 resection rate.**

**
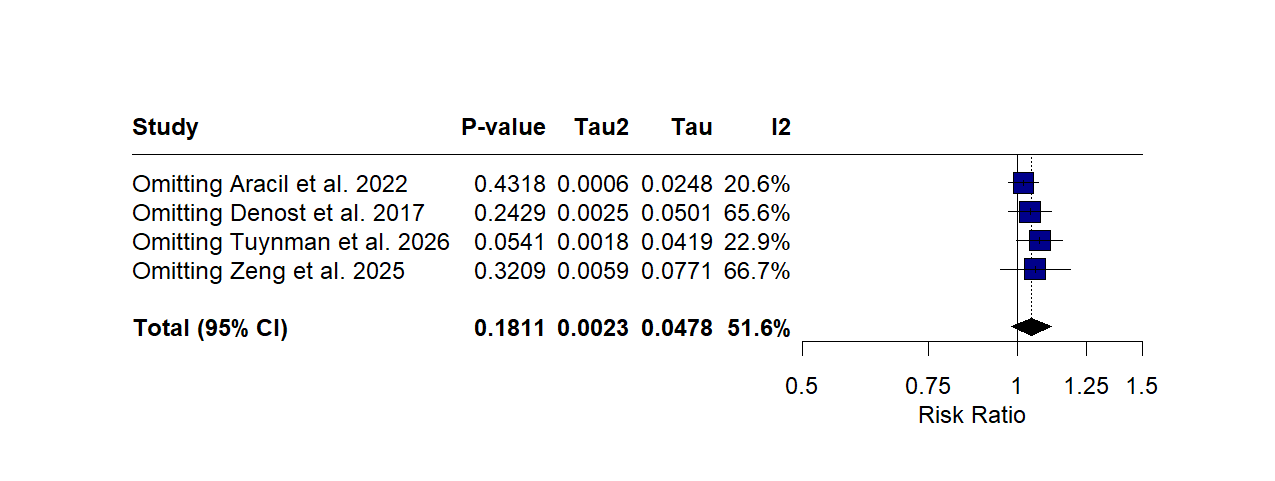
**

**Figure S4a:** Influencial plot of completeness of mesorectal excision.

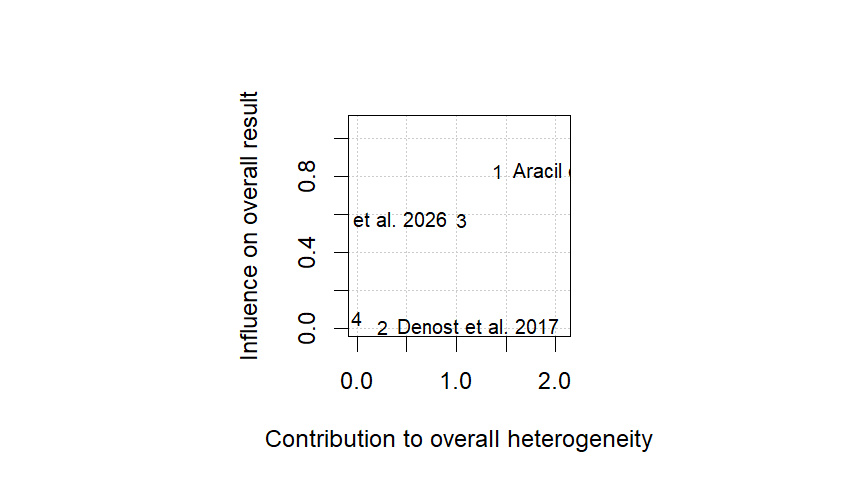


Figure S4b: Baujat Plot of completeness of mesorectal excision

**
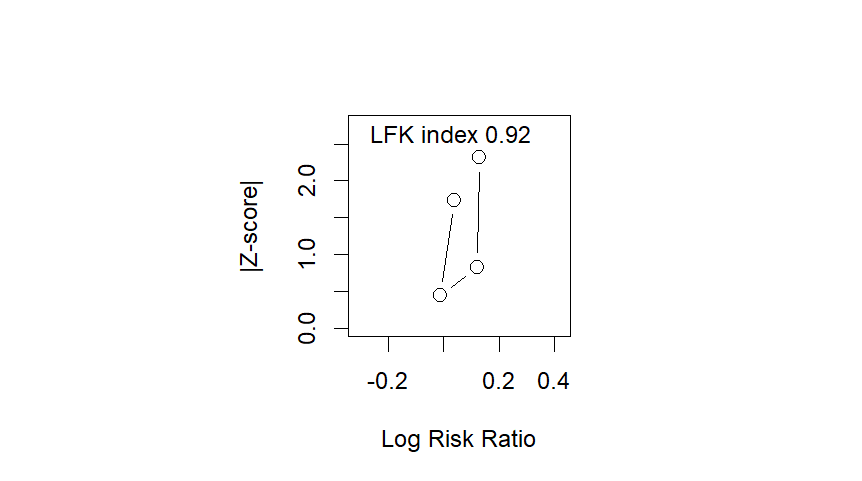
**

Figure S4c: DOI plot of completeness of mesorectal excision

**
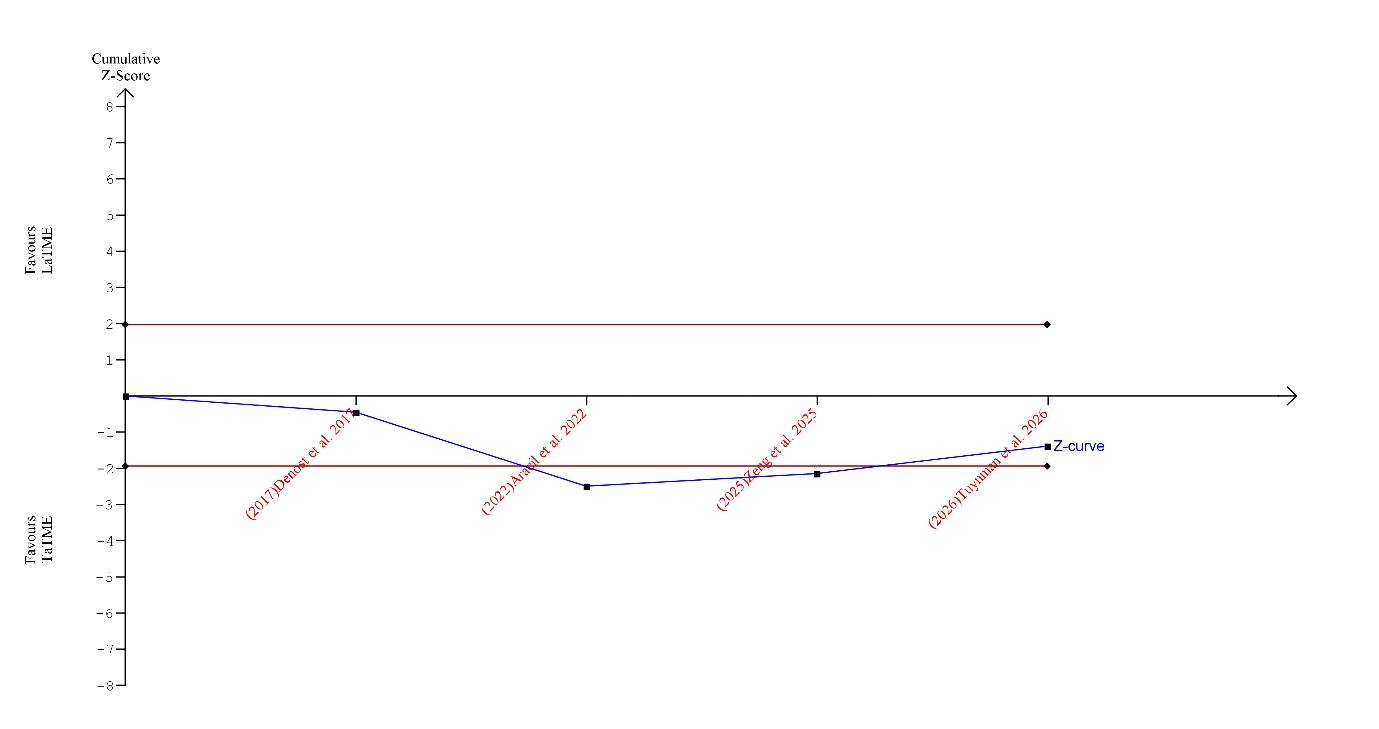
**

**Figure S4d:** TSA of completeness of mesorectal excision

**
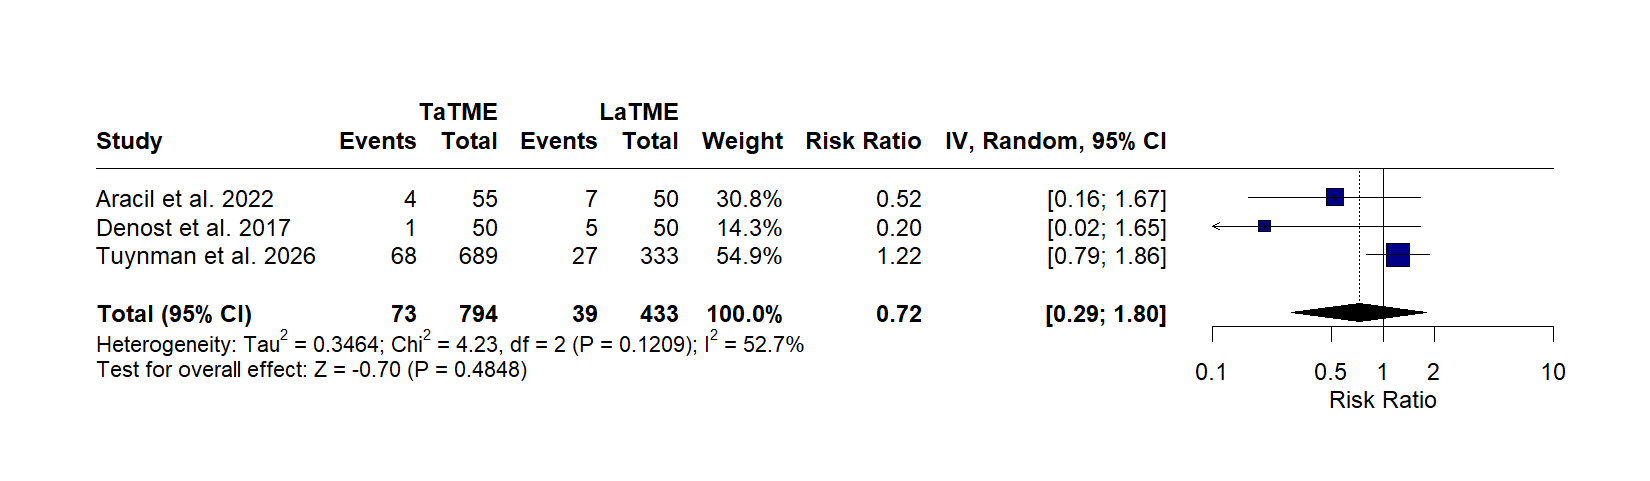
**

**Figure S5a:** Forest plot of a**nastomotic leakage.**


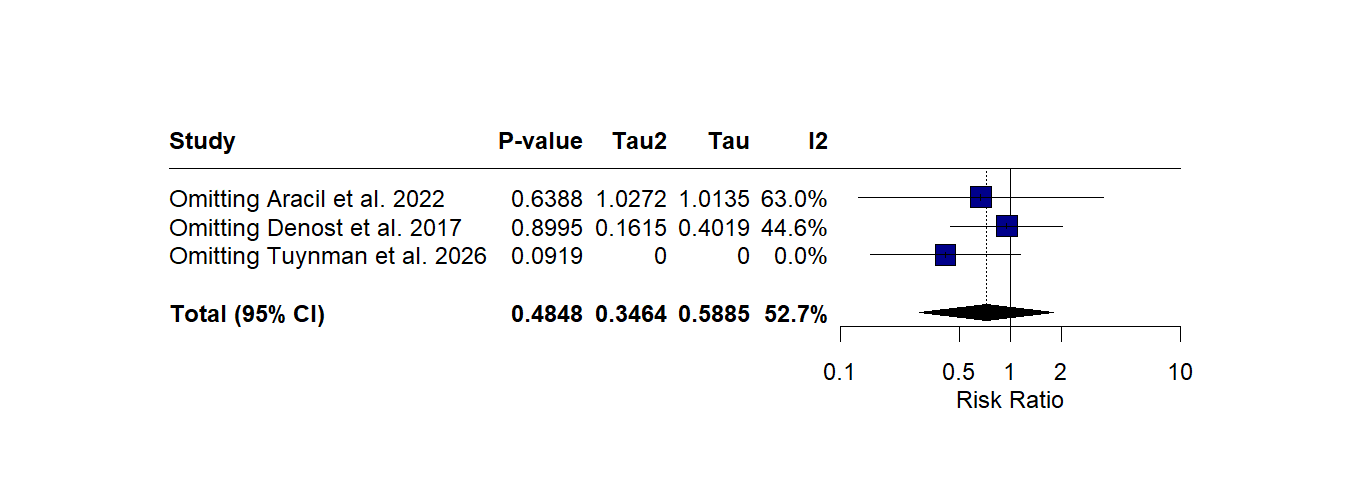


Figure S5b: Influencial plot of **anastomotic leakage.**

**
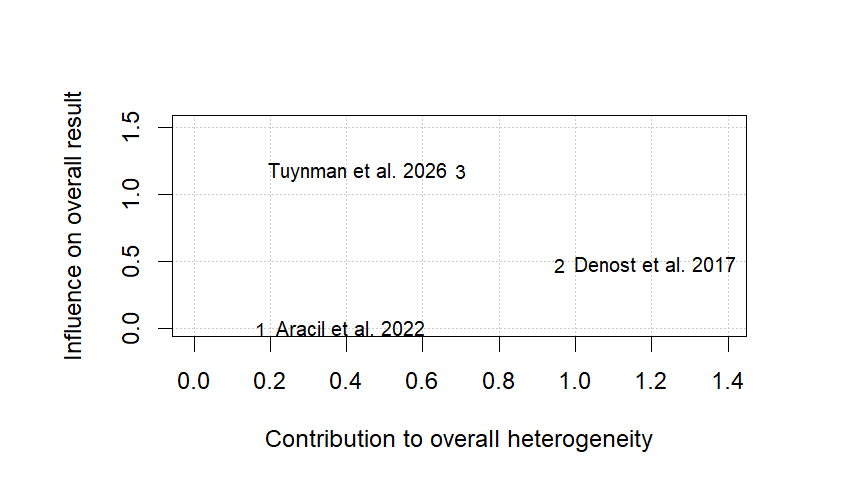
**

Figure S5c: Baujat Plot of **anastomotic leakage.**

**
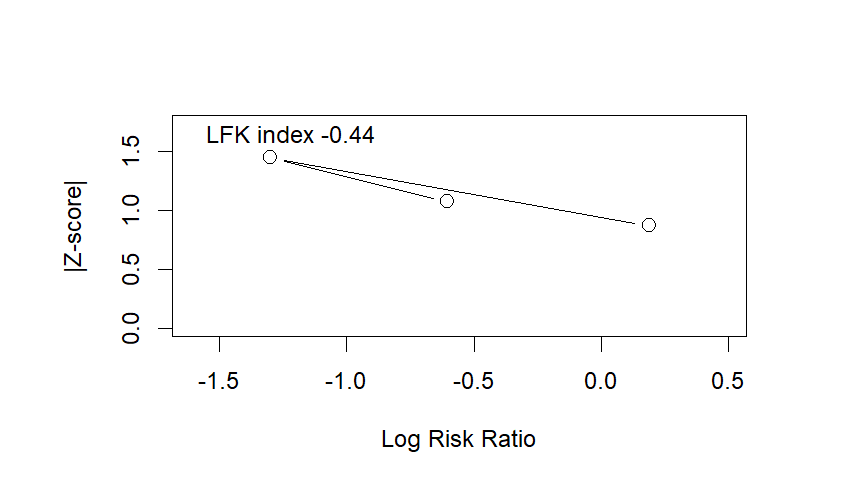
**

**Figure S5d:** DOI plot of a**nastomotic leakage.**

**
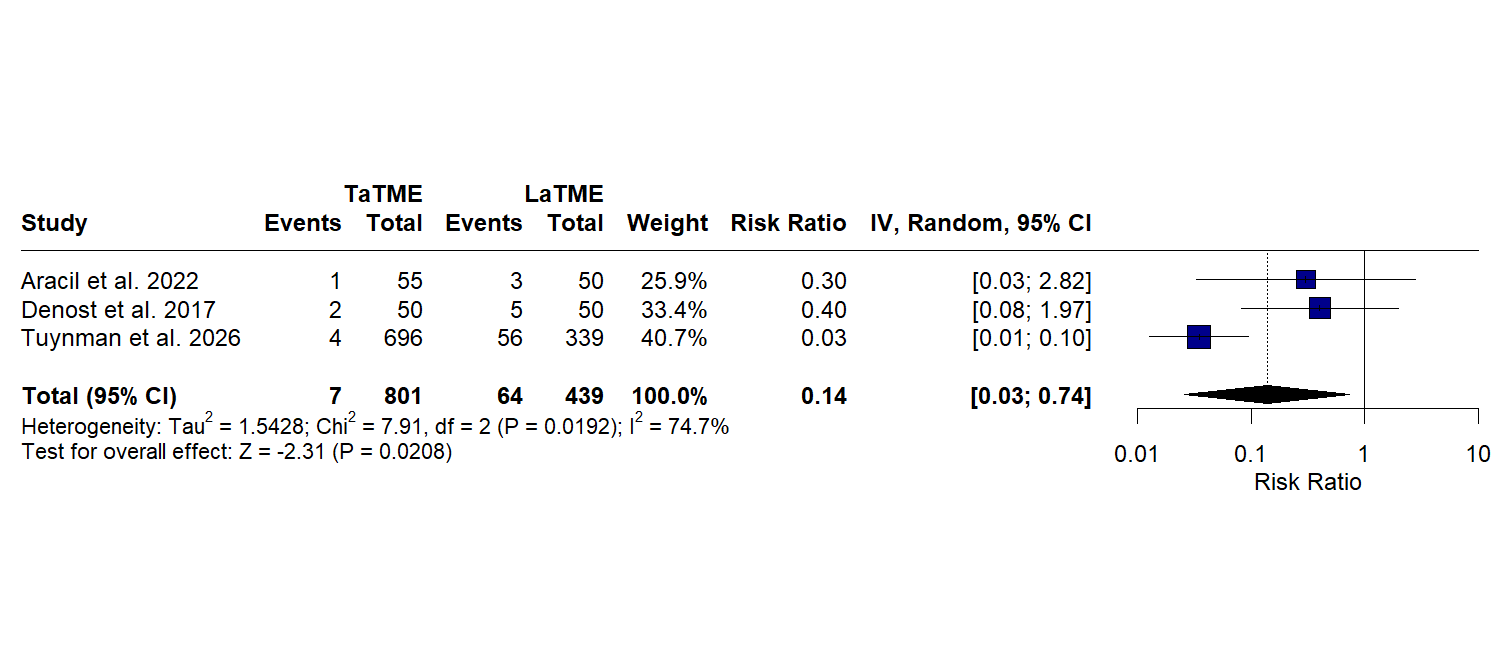
**

**Figure S6a:** Forest plot of **conversion to open surgery**


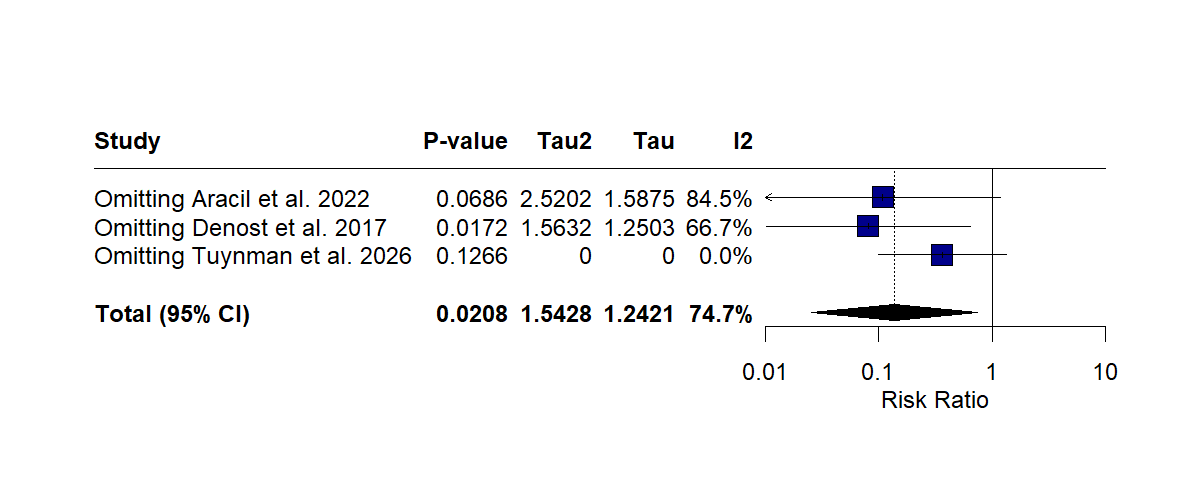


Figure S6b: Influencial plot of **conversion to open surgery**


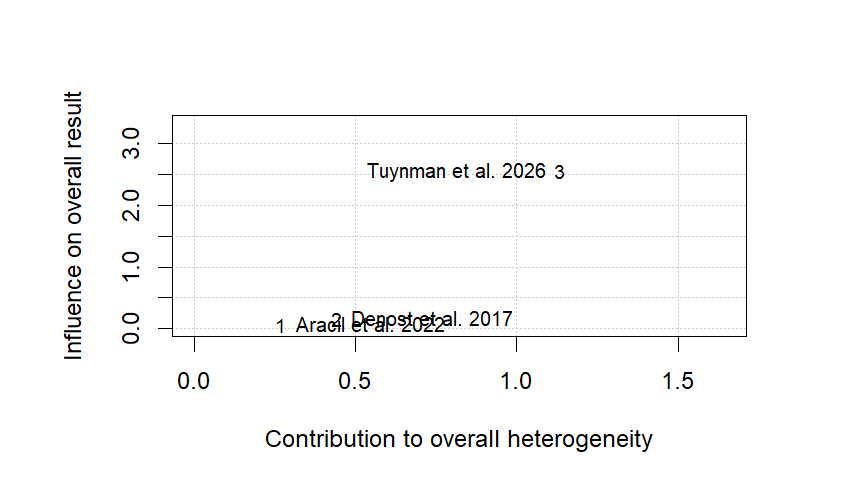


Figure S6c: Baujat Plot of **conversion to open surgery**


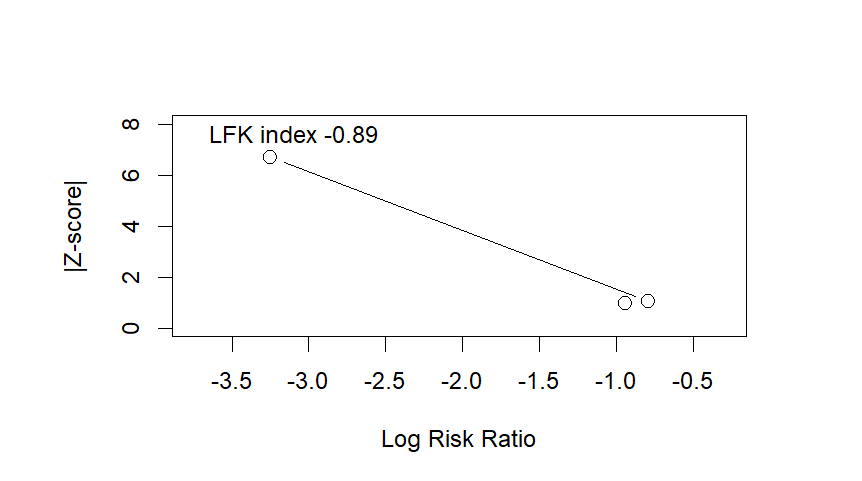


**Figure S6d:** DOI plot of **conversion to open surgery**


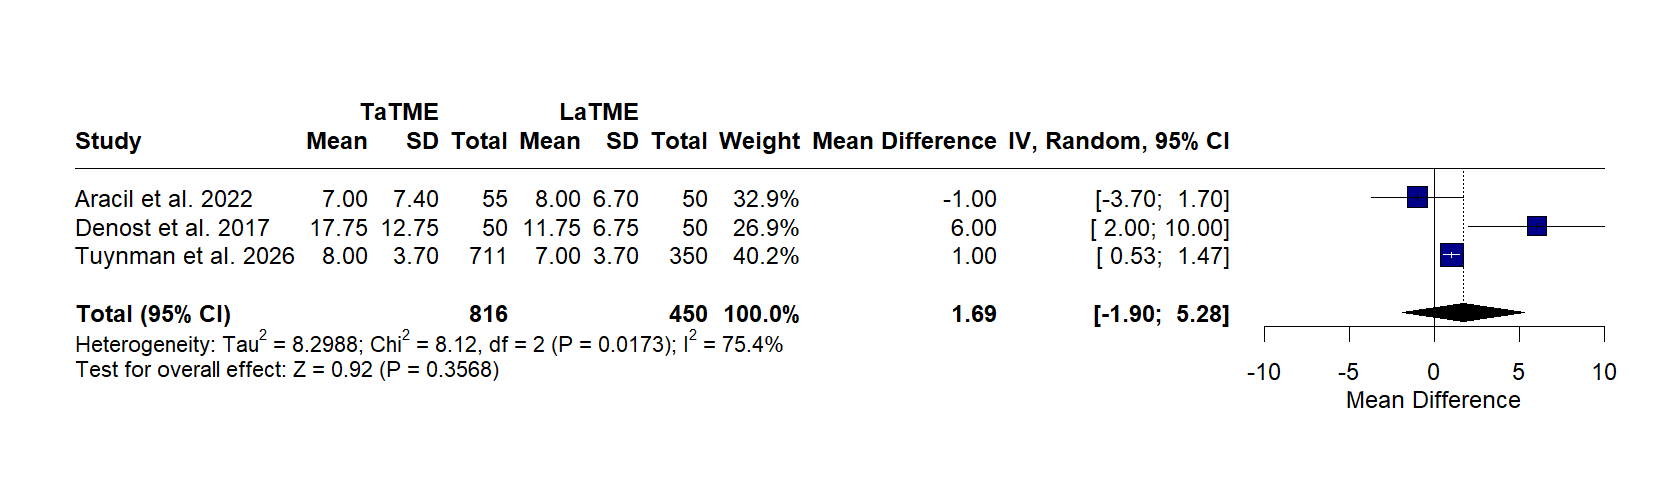


**Figure S7a:** Forest plot of **Hospital Stay**


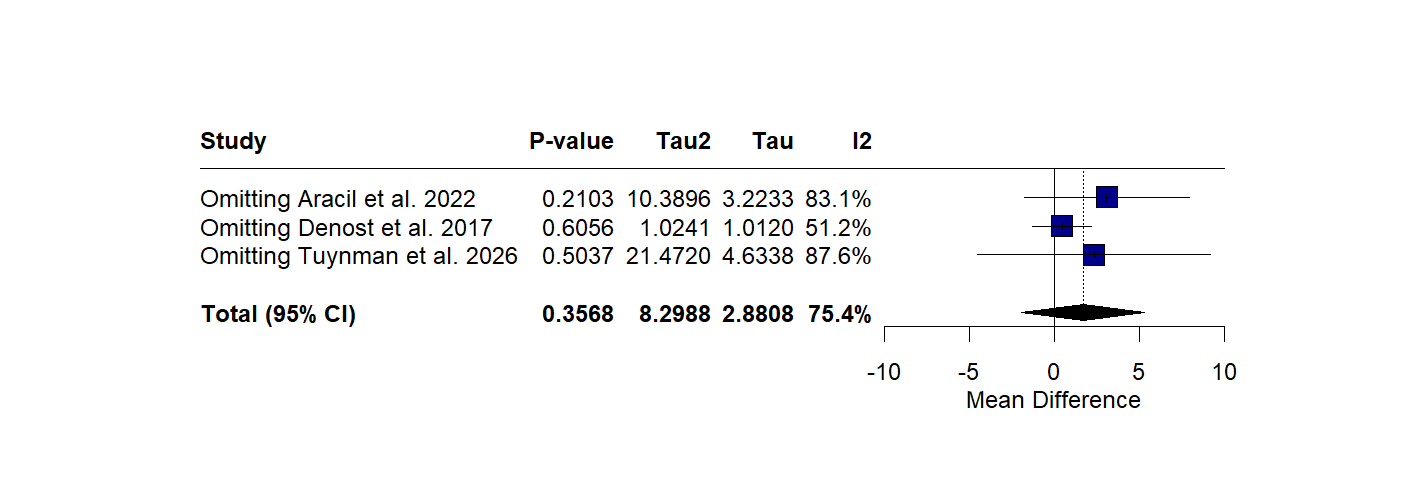


Figure S7b: Influencial plot of **Hospital Stay**


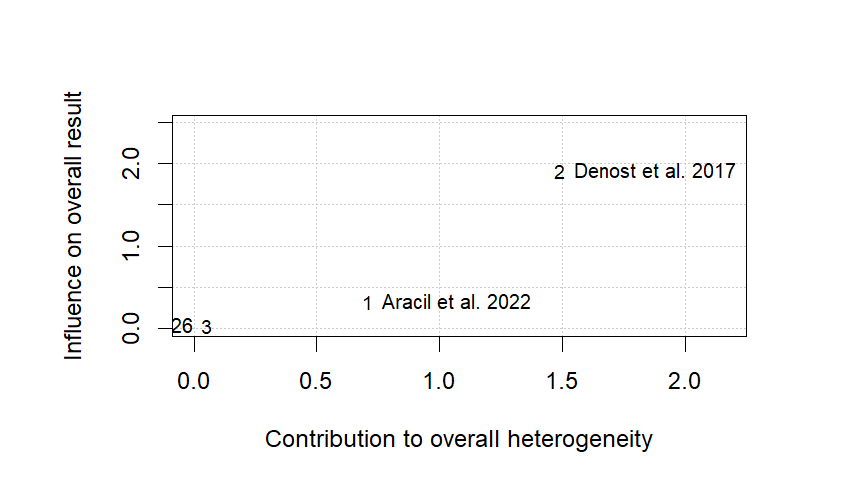


Figure S7c: Baujat Plot of **Hospital Stay**


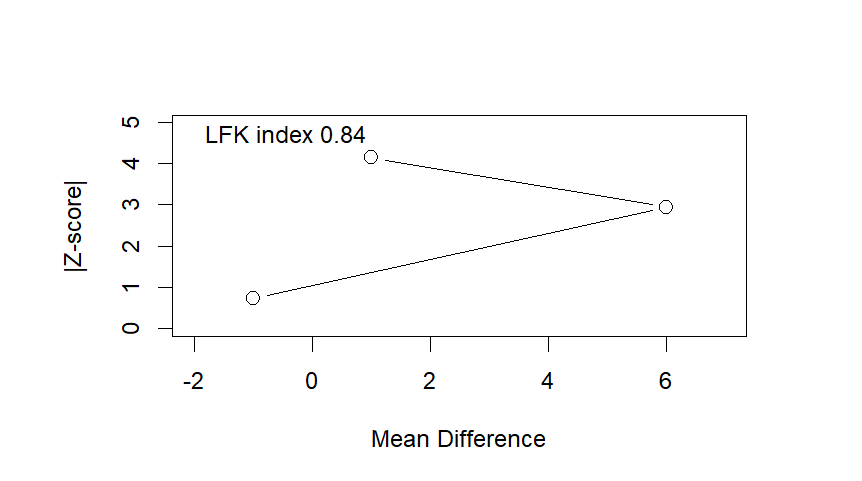


**Figure S7d:** DOI plot of **Hospital Stay**

**
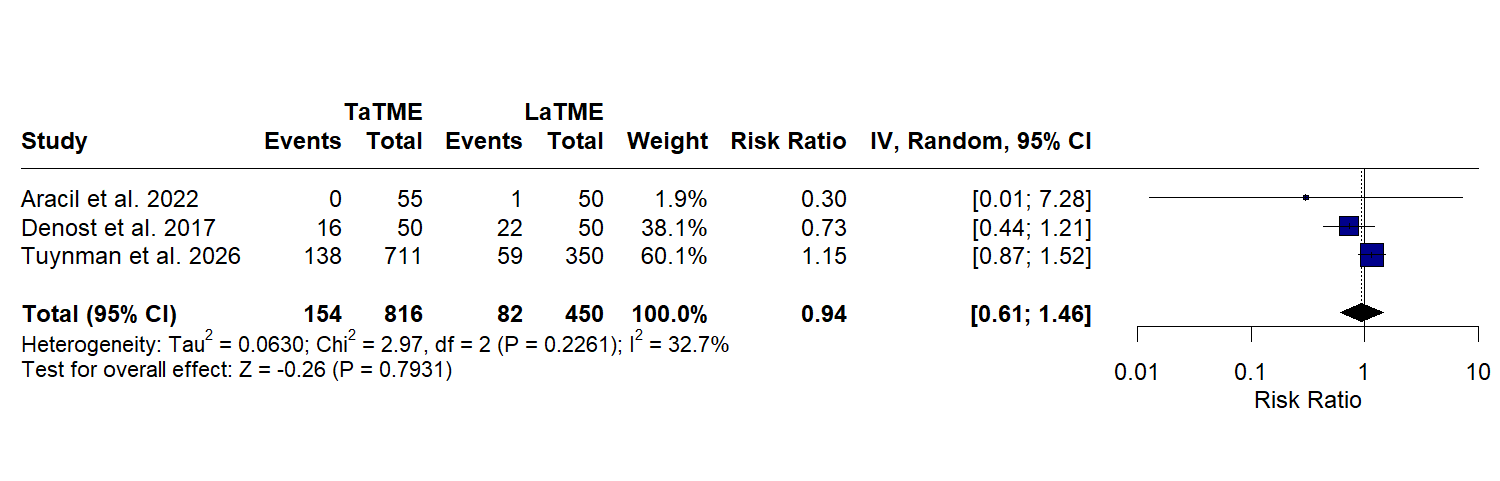
**

**Figure S8a:** Forest plot of **Overall Morbidity**


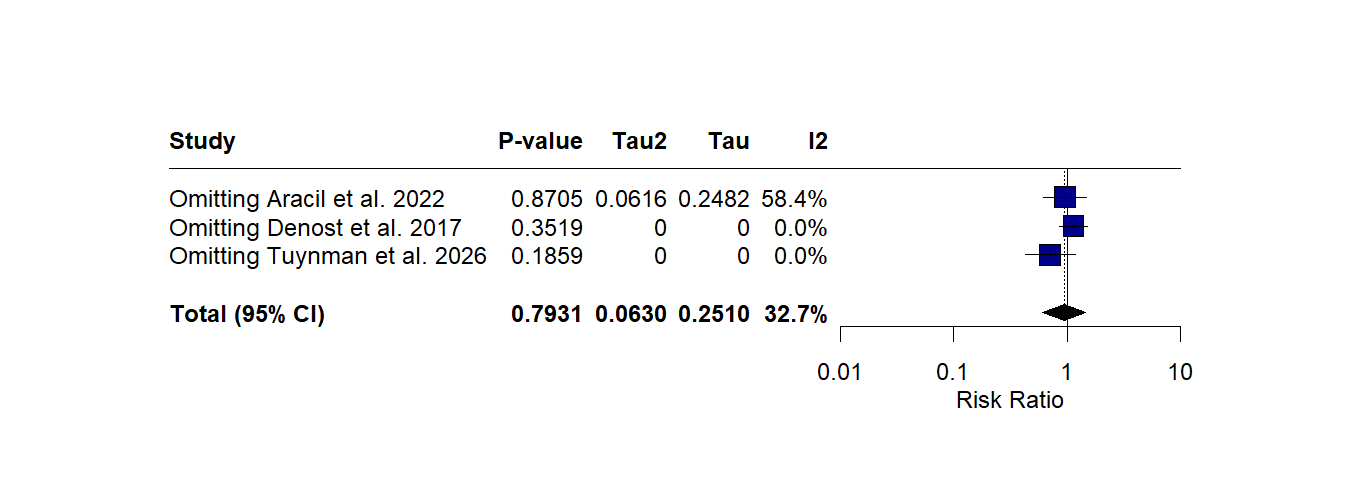


Figure S8b: Influencial Plot of **Overall Morbidity**

**
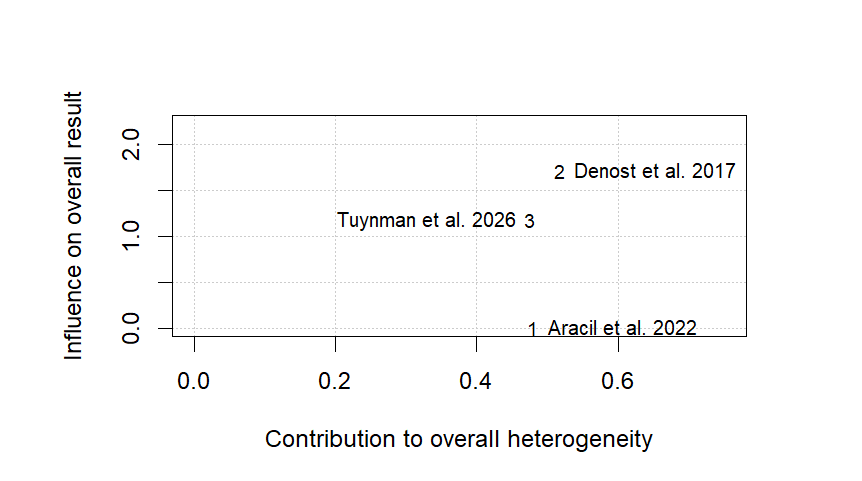
**

Figure S8c: Baujat plot of **Overall Morbidity**

**
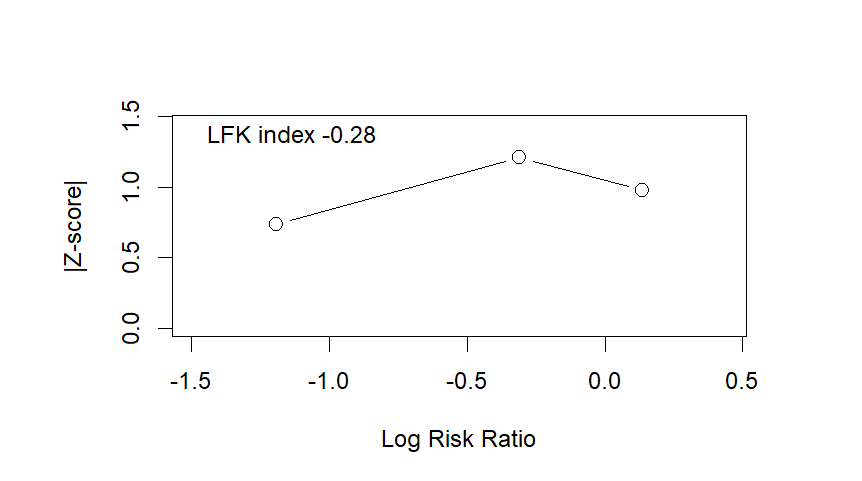
**

**Figure S8d:** DOI plot of **Overall Morbidity**


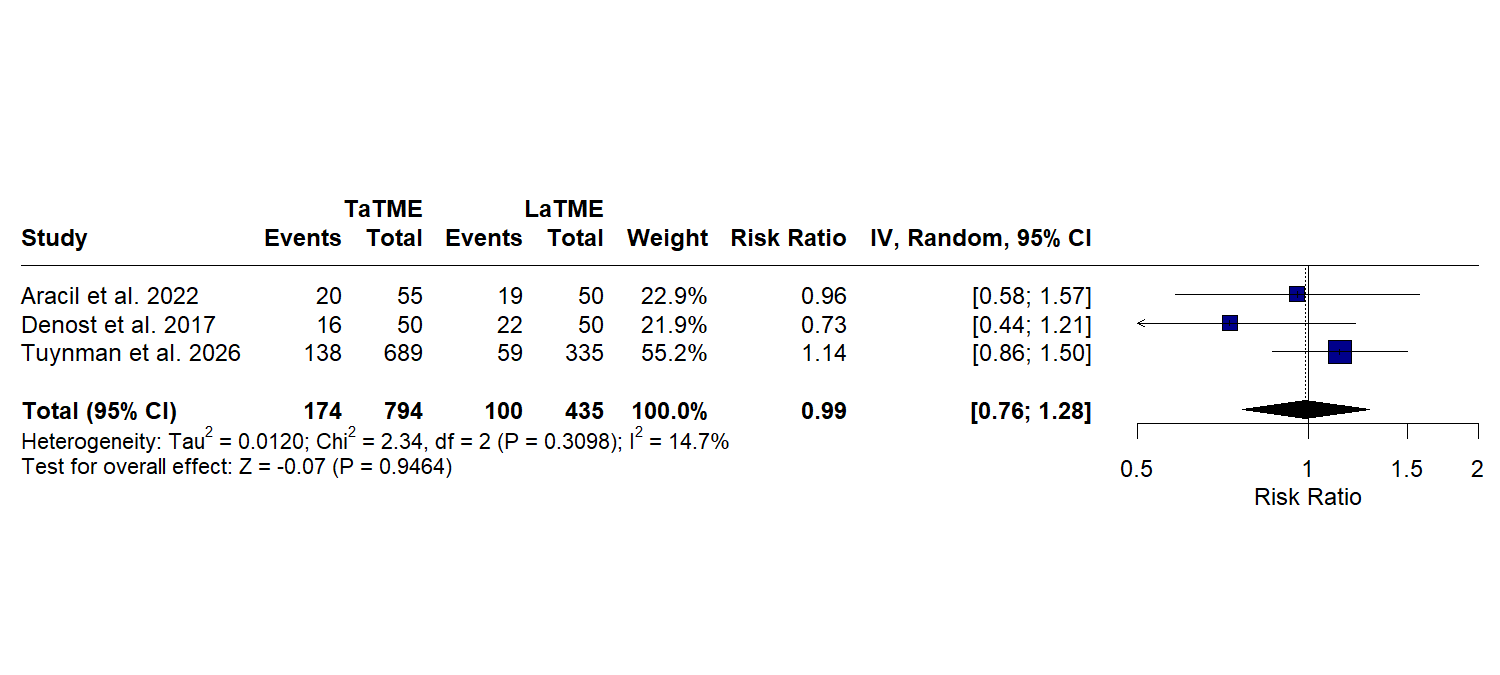


**Figure S9a:** Forest plot of **post-operative complications**


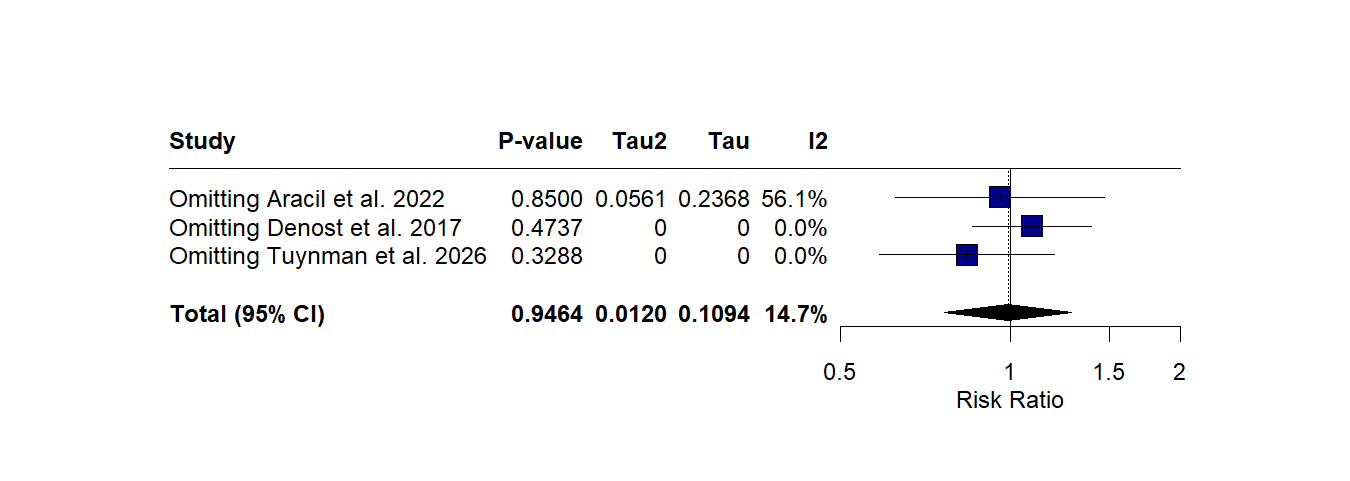


Figure S9b: Influencial Plot of **Post-operative complications**

**
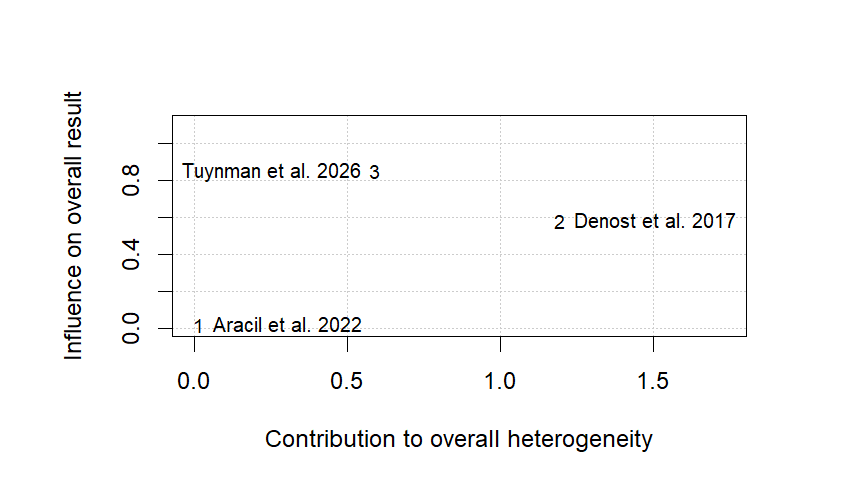
**

Figure S9c: Baujat plot of **post-operative complications**

**
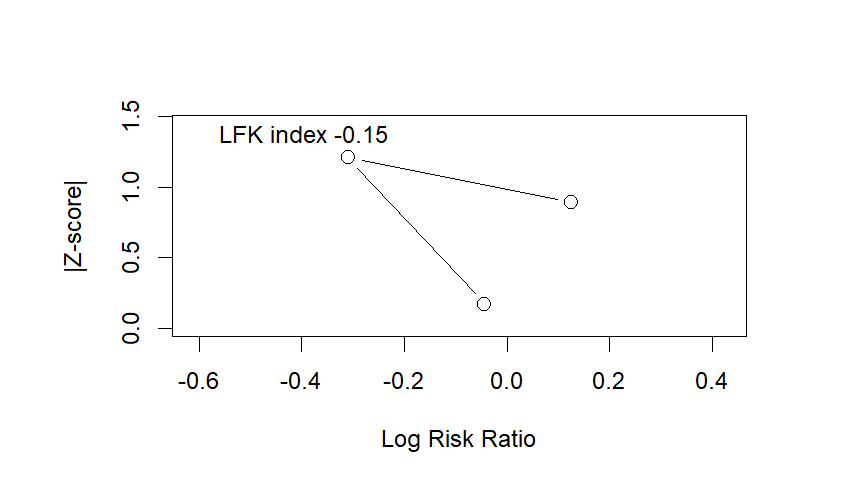
**

**Figure S9d: DOI** of **post-operative complications**


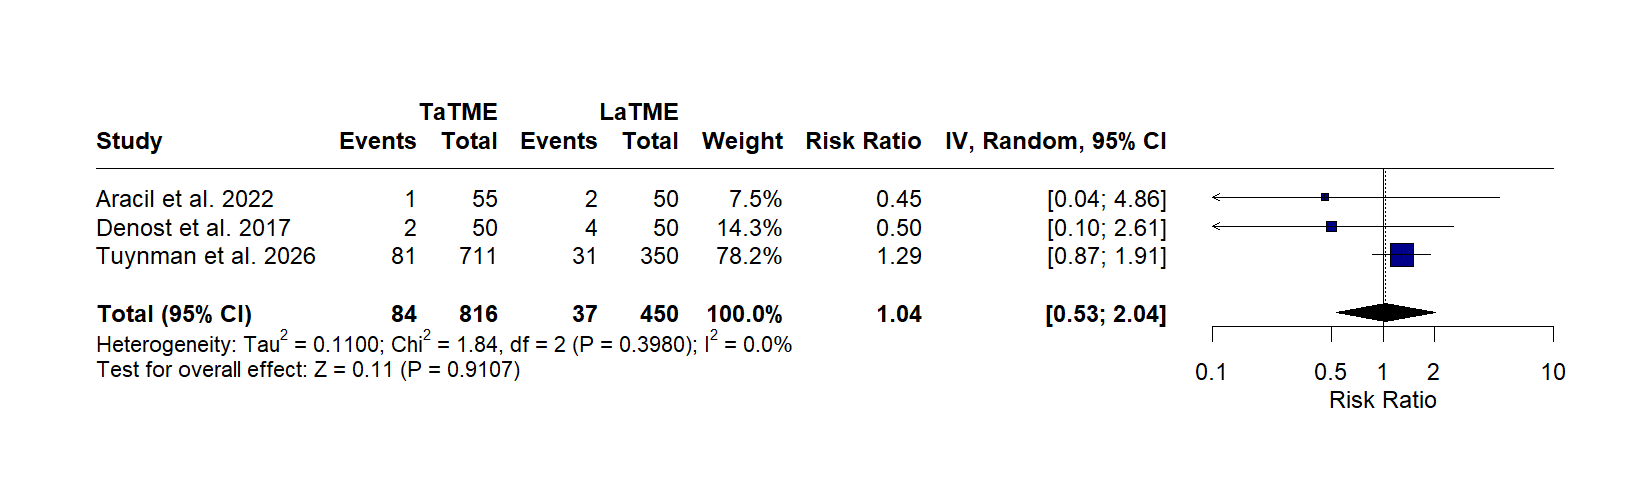


**Figure S10a:** Forest plot of **Reoperation rate**


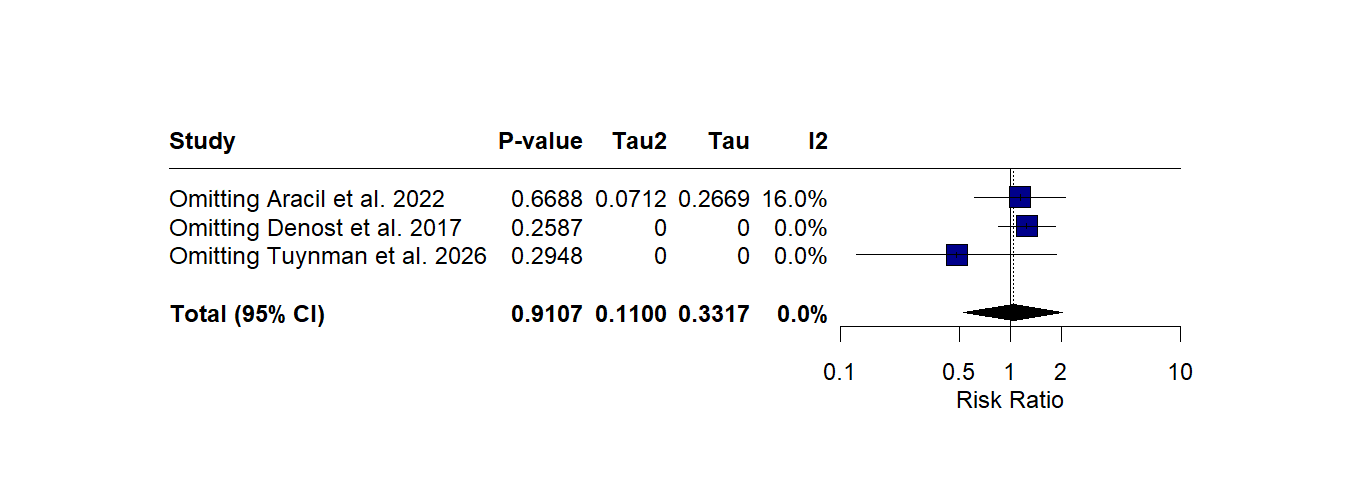


Figure S10b: Influencial Plot of **Reoperation rate**

**
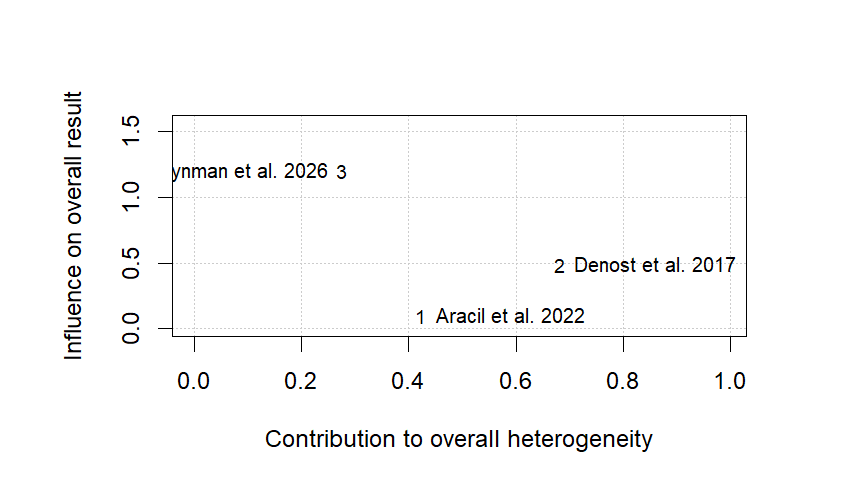
**

Figure S10c: Baujat plot of **Reoperation rate**

**
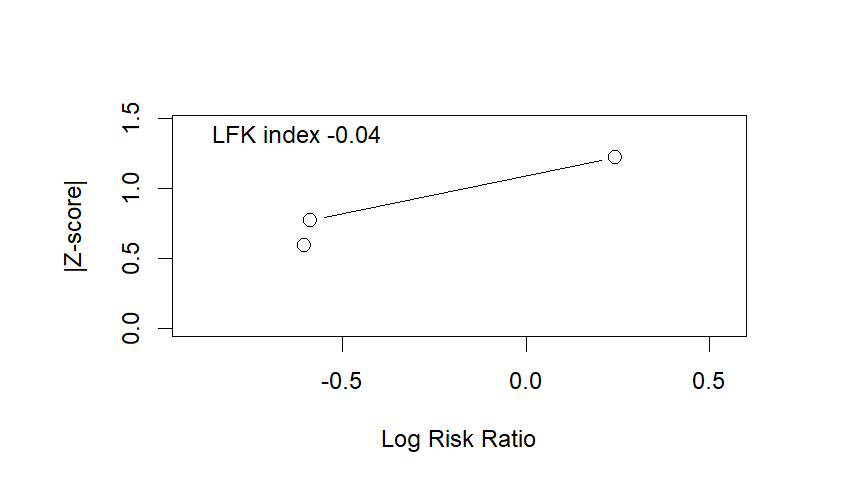
**

**Figure S10d:** DOI of **Reoperation rate**

**
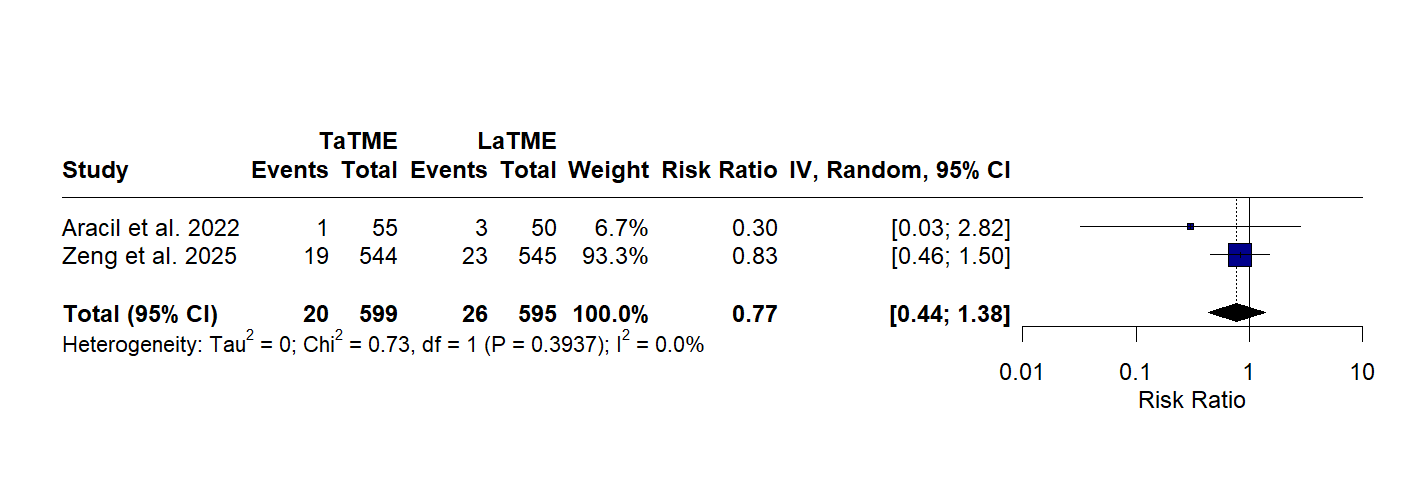
**

**Figure S11a:** Forest plot of 3-Year Local Recurrence

**
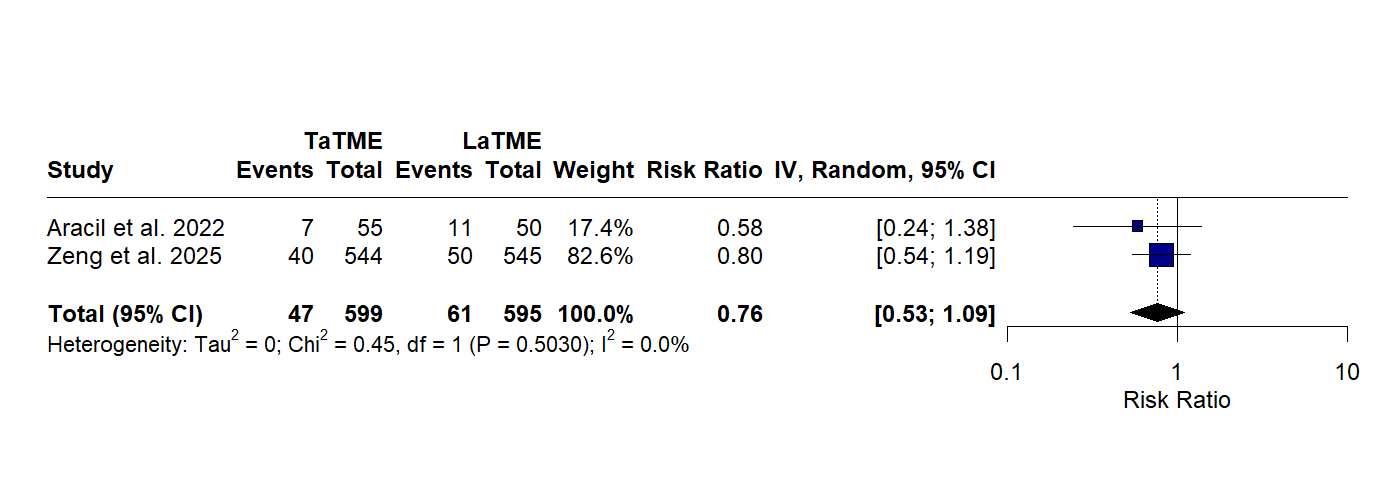
**

**Figure S11b:** Forest plot of 3-Year overall survival


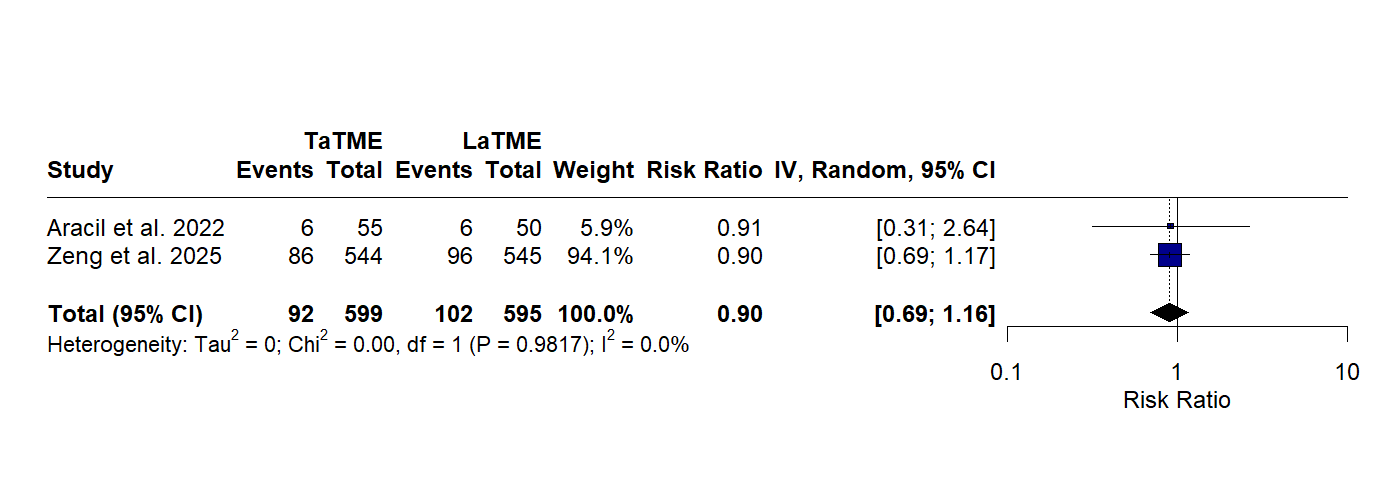


**Figure S11c:** Forest plot of **3-Year Disease-Free Survival**
